# Supplementary material for: Walking around the Autonomous Province of Trento (Italy): An Ethnobotanical Investigation
Source: MDPI journal article supplement (doi:10.3390/plants11172246), 2022-08-29
Supplement: s1 [file s1]

**Table S1:** Plants cited by the informants exploited for liquor preparation

| Scientific Name                    | Habitat                        | Plant part used           | Balsamic period     | Preparation                  | Pathology |
|------------------------------------|--------------------------------|---------------------------|---------------------|------------------------------|-----------|
| <i>Achillea erba-rotta</i> All.    | Grasslands                     | Aerial parts              | July-August         | Steeping in grappa           | -         |
| <i>Aloysia citrodora</i> Palau     | Cultivated                     | Leaves                    | July                | Steeping in grappa           | -         |
| <i>Artemisia nitida</i> Bertol.    | Rock fissures - stony pastures | Whole plant               | July                | Spirit                       | Dyspepsia |
| <i>Cornus mas</i> L.               | Woods - Hedges                 | Berries                   | September           | Steeping in grappa           | -         |
| <i>Galium odoratum</i> L.          | Woods                          | Whole plant without roots | Spring              | Steeping in grappa           | -         |
| <i>Juglans sp.pl.</i>              | Cultivated - Woods             | Nuts                      | When nuts are green | Steeping in grappa           | Dyspepsia |
| <i>Nigritella nigra</i> (L.) Rchb. | Grasslands                     | Flowers                   | Summer              | Steeping in grappa           | -         |
| <i>Pinus mugo</i> Turra            | Dwarf Pine scrub               | Buds, green cones         | Summer              | Steeping in grappa<br>Spirit | -<br>-    |
| <i>Prunus spinosa</i> L.           | Woods - Hedges                 | Berries                   | Autumn              | Spirit                       | Dysentery |
| <i>Vaccinium myrtillus</i> L.      | Woods - Heaths                 | Fruits                    | Summer              | Steeping in grappa           | -         |

**Table S2:** Plants cited by the informants exploited for veterinary purposes

| Scientific Name                                                | Habitat                      | Plant part used     | Balsamic period | Preparation | Pathology      |
|----------------------------------------------------------------|------------------------------|---------------------|-----------------|-------------|----------------|
| <i>Elymus repens</i> (L.) Gould Syn. <i>Agropyrum repens</i> L | Grasslands                   | Rhizomes            | Summer          | Raw         | Diuretic       |
| <i>Artemisia absinthium</i> L                                  | Meadows - Forest undergrowth | Aerial parts        | Summer          | Infusion    | Cow dyspepsia  |
| <i>Leontopodium alpinum</i> Cass                               | Pastures                     | Flowers             | Summer          | Infusion    | Cows dysentery |
| <i>Malva sylvestris</i> L.                                     | Grasslands – waysides        | Leaves e<br>Flowers | Summer          | Infusion    | Cow dyspepsia  |
| <i>Medicago sativa</i> L.                                      | Grasslands - Cultivated      | Aerial parts        | Summer          | Feed        | -              |

**Table S3:** Plants cited by the informants exploited for medicinal purposes

| Scientific Name                                                       | Habitat                        | Plant part used    | Balsamic period | Preparation                                 | Pathology                                  |
|-----------------------------------------------------------------------|--------------------------------|--------------------|-----------------|---------------------------------------------|--------------------------------------------|
| <i>Abies alba</i> Mill.                                               | Woods                          | Resin              | -               | Resin blisters                              | Muscle and joint pain                      |
|                                                                       |                                | Needles            | -               | Essential oil                               | Diseases of the respiratory system         |
| <i>Achillea millefolium</i> L.                                        | Meadows                        | Flowering tops     | Summer          | Infusion                                    | Menstrual pain and oligomenorrhea          |
|                                                                       |                                |                    |                 | Oleolite                                    | Muscle and joint pain                      |
| <i>Elymus repens</i> (L.)<br>Gould Syn.<br><i>Agropyrum repens</i> L. | Grasslands                     | Rhizomes           | Summer          | Decoction                                   | Urinary tract infections                   |
| <i>Arctium lappa</i> L.                                               | Tall herb fringes              | Fresh leaves       | July            | Skin applications                           | Bug bites                                  |
|                                                                       |                                | Roots              | Autumn          | Decoction                                   | Diuretic                                   |
| <i>Arnica montana</i> L.                                              | Grasslands                     | Flowers            | July            | Tincture or Oleolite                        | Muscle and joint pain, muscle strain       |
|                                                                       |                                |                    |                 | Pack                                        | Sprains                                    |
| <i>Artemisia absinthium</i> L.                                        | Meadows, roadsides             | Branches           | Summer          | Raw branches<br>Pack with powdered branches | Dyspepsia and worms<br>Sprainse rheumatism |
|                                                                       |                                | Leaves and Flowers | May - June      | Infusion                                    | Dyspepsia                                  |
| <i>Bryonia alba</i> L.                                                | Wood edge - hedges             | Roots              | Autumn          | Tincture                                    | Muscle and joint pain                      |
| <i>Calendula officinalis</i> L.                                       | Cultivated                     | Flowers            | June - July     | Oleolite                                    | Wounds, burns                              |
| <i>Capsella bursa-pastoris</i> L.                                     | Cultivated Roadsides - Meadows | Basal rosette      | June - August   | Infusion                                    | Fevers, diarrhea, urogenital diseases      |
|                                                                       |                                |                    |                 | Raw                                         |                                            |
|                                                                       |                                |                    |                 | Tincture                                    | Rheumatism                                 |
| <i>Carum carvi</i> L.                                                 | Pastures                       | Seeds              | Summer          | Infusion                                    | Dyspepsia, bloating and a swollen belly    |

| Scientific Name                                                     | Habitat                                     | Plant part used      | Balsamic period | Preparation                    | Pathology                                                         |
|---------------------------------------------------------------------|---------------------------------------------|----------------------|-----------------|--------------------------------|-------------------------------------------------------------------|
| <i>Senna alexandrina</i> Mill. Syn. <i>Cassia angustifolia</i> Vahl | Cultivated                                  | Leaves and fruits    | Summer          | Infusion                       | Constipation                                                      |
| <i>Cetraria islandica</i> L.                                        | Alpine and subalpine dwarf shrub formations | Whole plant          | Summer          | Syrup                          | Diseases of the respiratory system                                |
| <i>Chelidonium majus</i> L.                                         | Waysides – Hedgerows – Woods edges          | Latex                | Summer          | Direct application             | Corns, calluses and warts                                         |
| <i>Cornus mas</i> L.                                                | Woods - Hedges                              | Berries              | September       | Gelatine                       | Dysentery                                                         |
| <i>Crataegus monogyna</i> Jacq.                                     | Woods - Edges                               | Flowers              | Spring          | Infusion                       | Hypertension and arrhythmias                                      |
| <i>Cyclamen purpurascens</i> Mill.                                  | Woods                                       | Bulb                 | July-August     | Oleolite                       | Ear infection                                                     |
| <i>Equisetum arvense</i> L.                                         | Cultivated fields                           | Buds                 | May - July      | Infusion                       | Diseases of the urogenital system                                 |
| <i>Gentiana lutea</i> L.                                            | Pastures                                    | Roots                | Autumn          | Decoction or Tincture          | Dyspepsia                                                         |
| <i>Hypericum perforatum</i> L.                                      | Pastures - Dry grasslands - Hedges          | Flowers              | July            | Infusion                       | Infections of the respiratory system                              |
|                                                                     |                                             |                      |                 | Oleolite                       | Diseases of the skin                                              |
|                                                                     |                                             |                      |                 | Infusion                       | Depression                                                        |
| <i>Juniperus sp.pl.</i>                                             | Shrubs - Woods                              | Berries              | Autumn          | Infusion<br>Steeping in grappa | Dyspepsia and urinary tract infections<br>-                       |
| <i>Larix sp.pl.</i>                                                 | Woods                                       | Resin                | Autumn          | Ointment                       | Cold, herpes, insect bites with abscesses and cuts on the fingers |
|                                                                     |                                             | Fresh female flowers | Summer          | Steeping in grappa             | -                                                                 |
| <i>Leontopodium alpinum</i> Cass                                    | Pastures                                    | Flowers              | Summer          | Extract                        | Skin aging                                                        |
| <i>Lycopodium clavatum</i> L.                                       | Pastures – Heaths - Woods                   | Flowers              | Summer          | Powdered flowers               | Disease of the skin                                               |

| Scientific Name                  | Habitat                                 | Plant part used    | Balsamic period   | Preparation                     | Pathology                                        |
|----------------------------------|-----------------------------------------|--------------------|-------------------|---------------------------------|--------------------------------------------------|
| <i>Malva sylvestris</i> L.       | Grasslands - waysides                   | Leaves and Flowers | May - June        | Compress, Infusion<br>Decoction | Muscle aches, oral and eye infections            |
|                                  |                                         | Fresh leaves       | June - September  | Infusion                        | Dyspepsia                                        |
| <i>Matricaria chamomilla</i> L.  | Weed vegetation                         | Flowers            | July              | Compress<br>Infusion            | Conjunctivitis<br>Dyspepsia and muscle aches     |
| <i>Melissa officinalis</i> L.    | Ruderal vegetation - Cultivated         | Leaves             | June - July       | Infusion                        | Insomnia and premenstrual syndrome               |
| <i>Nepeta cataria</i> L.         | Ruderal vegetation – Clearings (1000 m) | Leaves             | Summer            | Infusion                        | Muscle aches, Insomnia and premenstrual syndrome |
| <i>Oxalis acetosella</i> L.      | Forest undergrowth                      | Flowers            | Summer            | Ingredient for food             | Stomach Acidity and Dyspepsia                    |
| <i>Papaver rhoeas</i> L.         | Weed vegetation - Waysides              | Petals             | July              | Infusion                        | Insomnia and cough                               |
| <i>Picea abies</i> (L.) H.Karst. |                                         | Needles            | -                 | Essential oil                   | Diseases of the respiratory system               |
| <i>Pinus cembra</i> L.           | Woods                                   | Cones              | Summer            | Syrup                           | Diseases of the respiratory system               |
| <i>Pinus mugo</i> Turra          | Dwarf Pine scrub                        | Buds, green cones  | Summer            | Syrup                           | Diseases of the respiratory system               |
|                                  |                                         | Needles            | Spring            | Essential oil                   |                                                  |
| <i>Plantago lanceolata</i> L.    | Meadows                                 | Leaves             | Spring and Summer | Infusion<br>Pounded leaves      | Catarrh<br>Wounds and insect bite                |
| <i>Portulaca oleracea</i> L.     | Cultivated fields                       | Leaves and flowers | Late summer       | Food                            | -                                                |
|                                  |                                         |                    |                   | Infusion                        | Worm infection                                   |
| <i>Potentilla reptans</i> L.     | Meadows                                 | Leaves and flowers | Spring and Summer | Infusion                        | Diarrhea and fever                               |

| Scientific Name                                                                                                | Habitat                                | Plant part used    | Balsamic period   | Preparation      | Pathology                                                                |
|----------------------------------------------------------------------------------------------------------------|----------------------------------------|--------------------|-------------------|------------------|--------------------------------------------------------------------------|
| <i>Pulmonaria officinalis</i> L.                                                                               | Forest undergrowth                     | Leaves             | Spring            | Infusion         | Cough                                                                    |
| <i>Frangula alnus</i> Mill. Syn. <i>Rhamnus frangula</i> L.                                                    | Hedges - Woods                         | Bark               | Autumn            | Infusion         | Constipation                                                             |
| <i>Rhododendron ferrugineum</i> L.                                                                             | Shrubs - Woods                         | Galle              | Autumn            | Oleolite         | Gout, joint pain                                                         |
| <i>Rhodiola rosea</i> L.                                                                                       | Dry grasslands                         | Roots              | Autumn            | Infusion         | Depression                                                               |
| <i>Rosa canina</i> L.                                                                                          | Wood margins - Hedges                  | Berries            | Late October      | Food<br>Infusion | Cough and sore throat                                                    |
| <i>Sambucus nigra</i> L.                                                                                       | Woods - Hedges                         | Flowers            | Spring            | Infusion         | Cold                                                                     |
| <i>Satureja montana</i> L.                                                                                     | Dry stony grasslands - Waysides        | Leaves and flowers | Summer            | Infusion         | Digestive, reduces nervous gastric pains, bloating, and vomiting         |
| <i>Hylotelephium telephium</i> (L.) Holub Syn. <i>Sedum telephium</i> L.                                       | Wood margins – Dry grasslands          | Leaves             | Spring and Summer | Raw leaves       | Dermatitis, hemorrhoid abscesses, subside sores or ulcers, wound healing |
| <i>Solanum nigrum</i> L.                                                                                       | Cultivated fields – Ruderal vegetation | Berries            | Summer            |                  | Warts and dermatitis                                                     |
| <i>Solidago virgaurea</i> L.                                                                                   | Grasslands - Woods                     | Flowering tops     | July-August       | Infusion         | Cystitis                                                                 |
| <i>Filipendula ulmaria</i> (L.) Maxim.                                                                         | Meadows (up to 1500 m a.s.l.)          | Flowers            | Summer            | Tincture         | Muscle and joint pain                                                    |
| <i>Symphytum officinale</i> L.                                                                                 | Forest undergrowth                     | Roots              | Autumn            | Oleolite         | Muscle and joint pain, muscle strain                                     |
| <i>Taraxacum</i> F.H.Wigg. sect. <i>Taraxacum</i> Syn. <i>Taraxacum officinale</i> (L.) W.W.Weber ex F.H.Wigg. | Meadows – Wet grasslands               | Roots              | Autunno           | Decoction        | Diuretic                                                                 |

| Scientific Name                                                     | Habitat                                | Plant part used    | Balsamic period   | Preparation | Pathology                            |
|---------------------------------------------------------------------|----------------------------------------|--------------------|-------------------|-------------|--------------------------------------|
| <i>Tilia sp.pl.</i>                                                 | Woods - Cultivated                     | Flowers            | Late June         | Infusion    | Cough, cold, and tachycardia         |
|                                                                     | Woods - Cultivated                     | Flowers            | Late June         | Syrup       | Insomnia                             |
| <i>Thymus pulegioides</i> L. Syn. <i>Thymus serpyllum</i> L. pl.pl. | Dry grasslands                         | Aerial parts       | July              | Infusion    | Infections of the respiratory system |
| <i>Tussilago farfara</i> L.                                         | Pioneer vegetation on bare soil        | Flowers            | February          | Syrup       | Diseases of the respiratory system   |
|                                                                     | Undergrowth                            | Leaves and flowers | Before flowers    | Infusion    | Diseases of the respiratory system   |
| <i>Urtica dioica</i> L.                                             | Wastelands – forest margins - Waysides | Young plants       | Spring            | Infusion    | Idem                                 |
|                                                                     |                                        |                    |                   | Poultices   | Skin inflammation and wounds         |
|                                                                     |                                        |                    |                   | Compress    | Wounds                               |
| <i>Vaccinium vitis-idaea</i> L.                                     | Woods – Heaths                         | Leaves             | August            | Infusion    | Cystitis and colic                   |
| <i>Verbascum thapsus</i> L.                                         | Waysides – Ruderal vegetation          | Flowers            | Summer            | Infusion    | Infections of the respiratory system |
| <i>Viburnum lantana</i> L.                                          | Dry woods edges                        | Trichomes          | -                 | Powder      | Epistaxis                            |
| <i>Viola odorata</i> L.                                             | Grasslands – Hedges - woods edges      | Leaves and flowers | Spring and Summer | Infusion    | Cough                                |
